# Supplementary material for: The Butterfly Effect: Mild Soil Pollution with Heavy Metals Elicits Major Biological Consequences in Cobalt-Sensitized Broad Bean Model Plants
Source: MDPI journal article supplement (doi:10.3390/antiox11040793), 2022-04-18
Supplement: s1 [file s1]

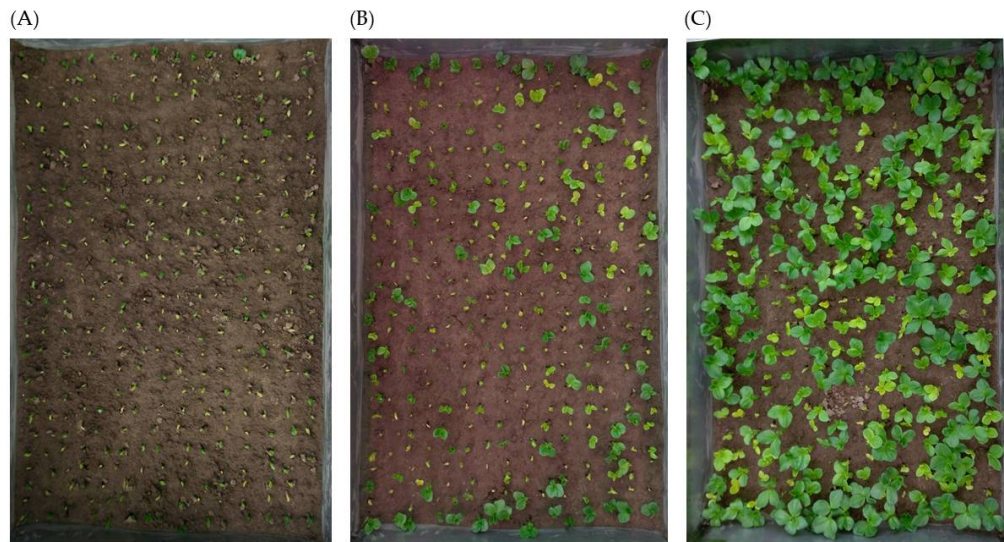

**Figure S1.** Growth progress of Co-treated *V. faba* plants in DF soil mix after one (A), two (B) and three (C) weeks after sowing.

**Table S1.** Morphometric characteristics (A), Pearson correlation matrix between plant morphological traits and soil chemistry-based indices Zs and RI (B) and eigenvalues, variance explained (%) and correlations between the principal components and the original variables (C) obtained from Co-untreated *V. faba* plants grown in soils of different pollution levels.

(A)

| Soil sample    | Plant height, cm        | Dry weight, g          | Leaf number per plant  | Zs         | RI         |
|----------------|-------------------------|------------------------|------------------------|------------|------------|
| Control        | 27.5 ± 0.9              | 5.3 ± 0.3              | 3.8 ± 0.3              | -          | 3.58       |
| DF1            | 19.4 ± 1.5 <sup>c</sup> | 3.0 ± 0.3 <sup>c</sup> | 2.7 ± 0.2 <sup>b</sup> | 26         | 11.49      |
| DF2            | 20.3 ± 0.9 <sup>c</sup> | 3.0 ± 0.3 <sup>c</sup> | 2.8 ± 0.1 <sup>b</sup> | 30         | 11.13      |
| DF3            | 21.8 ± 1.6 <sup>b</sup> | 3.2 ± 0.3 <sup>c</sup> | 2.8 ± 0.2 <sup>b</sup> | 37         | 79.58      |
| DF4            | 22.1 ± 1.2 <sup>c</sup> | 3.6 ± 0.3 <sup>c</sup> | 3.0 ± 0.2 <sup>a</sup> | 17         | 9.36       |
| DF5            | 24.3 ± 2.0              | 3.2 ± 0.3 <sup>c</sup> | 3.5 ± 0.2              | 65         | 13.88      |
| DF6            | 23.0 ± 1.0 <sup>c</sup> | 3.9 ± 0.3 <sup>c</sup> | 3.1 ± 0.1 <sup>a</sup> | 104        | 128.74     |
| DF7            | 21.7 ± 1.7 <sup>b</sup> | 3.5 ± 0.3 <sup>c</sup> | 2.9 ± 0.2 <sup>a</sup> | 83         | 83.16      |
| DF8            | 20.1 ± 2.4 <sup>b</sup> | 3.3 ± 0.4 <sup>c</sup> | 3.1 ± 0.2              | 67         | 13.94      |
| Average of DFs | 21.6 ± 0.5 <sup>c</sup> | 3.3 ± 0.2 <sup>c</sup> | 3.0 ± 0.2 <sup>a</sup> | 53.6 ± 2.1 | 43.9 ± 2.6 |

(B)

|                       | Plant height, cm | Dry weight, g | Leaf number per plant | Zs     | RI |
|-----------------------|------------------|---------------|-----------------------|--------|----|
| Plant height, cm      | 1                |               |                       |        |    |
| Dry weight, g         | 0.8527           | 1             |                       |        |    |
| Leaf number per plant | 0.9302           | 0.7953        | 1                     |        |    |
| Zs                    | -0.1842          | -0.2817       | -0.1147               | 1      |    |
| RI                    | -0.0205          | -0.0269       | -0.1952               | 0.7245 | 1  |

(C)

|                     | PC 1    | PC 2   | PC 3    | PC 4    | PC 5    |                           |
|---------------------|---------|--------|---------|---------|---------|---------------------------|
| Eigenvalue          | 2.8     | 1.6    | 0.4     | 0.1     | 0.01    | 0.2-0.39 weak corr        |
| Variance, %         | 56.6    | 32.5   | 8.2     | 2.6     | 0.2     | 0.4-0.69 moderate corr.   |
| Plant height, cm    | 0.5601  | 0.2040 | 0.0149  | -0.5705 | -0.5646 | 0.7-0.89 strong corr.     |
| Dry weight, g       | 0.5414  | 0.1450 | -0.4248 | 0.6993  | -0.1284 | 0.9-1.0 very strong corr. |
| Leaf number / plant | 0.5535  | 0.1500 | 0.4773  | -0.0477 | 0.6642  |                           |
| Zs                  | -0.2410 | 0.6540 | 0.5514  | 0.3279  | -0.3193 |                           |

|    |         |               |         |         |        |
|----|---------|---------------|---------|---------|--------|
| RI | -0.1690 | <b>0.6980</b> | -0.5363 | -0.2751 | 0.3488 |
|----|---------|---------------|---------|---------|--------|

DF1-8 – soil samples from territory of former drill factory; Zs – index of the total soil contamination, that accounts only for elements exceeding background level; RI – potential ecological risk index, consisting of the sum of potential ecological risk indices for all detected potentially harmful elements; <sup>a,b,c</sup>represent significant differences (<sup>a</sup>*P* < 0.05; <sup>b</sup>*P* < 0.01; <sup>c</sup>*P* < 0.001) between the control and soil collected from different DF sites. Statistically significant (*P* < 0.05) correlation coefficients are presented in bold.

**Table S2.** Frequency of morphoses (A), Pearson correlation matrix between different groups of morphoses and soil chemistry-based indices Zs and RI (B) and eigenvalues, variance explained (%) and correlations between the principal components and the original variables (C) obtained from Co-treated and untreated *V. faba* plants grown in soils of different pollution levels

(A)

| Soil sample | n  | Germination, %  | Frequency of morphoses, % |                      |                      |
|-------------|----|-----------------|---------------------------|----------------------|----------------------|
|             |    |                 | NG                        | LG                   | Y                    |
| C           | 30 | 100             | 53 ± 9                    | 40 ± 9               | 7 ± 5                |
| DF1         | 26 | 90 <sup>a</sup> | 22 ± 8 <sup>c</sup>       | 44 ± 10              | 33 ± 9 <sup>c</sup>  |
| DF4         | 28 | 93              | 29 ± 9 <sup>c</sup>       | 64 ± 9 <sup>c</sup>  | 7 ± 5                |
| DF6         | 45 | 90 <sup>b</sup> | 4 ± 3 <sup>c</sup>        | 56 ± 7 <sup>c</sup>  | 40 ± 7 <sup>c</sup>  |
| DF7         | 25 | 83 <sup>c</sup> | 20 ± 8 <sup>c</sup>       | 44 ± 10              | 36 ± 10 <sup>c</sup> |
| DF8         | 19 | 95              | 11 ± 7 <sup>c</sup>       | 68 ± 11 <sup>c</sup> | 21 ± 10 <sup>c</sup> |

(B)

|                | RI            | Zs             | Germination, % | NG, %          | LG, %   | Y, % |
|----------------|---------------|----------------|----------------|----------------|---------|------|
| RI             | 1             |                |                |                |         |      |
| Zs             | <b>0.8706</b> | 1              |                |                |         |      |
| Germination, % | -0.6200       | -0.6397        | 1              |                |         |      |
| NG, %          | -0.6100       | <b>-0.8520</b> | 0.5777         | 1              |         |      |
| LG, %          | -0.0620       | 0.2416         | 0.1427         | -0.5334        | 1       |      |
| Y, %           | <b>0.7590</b> | <b>0.7970</b>  | <b>-0.7861</b> | <b>-0.7349</b> | -0.1816 | 1    |

(C)

|                | PC 1          | PC 2          | PC 3    | PC 4    | PC 5    |                         |
|----------------|---------------|---------------|---------|---------|---------|-------------------------|
| Eigenvalue     | 3.9           | 1.4           | 0.4     | 0.2     | 0.1     | 0.2-0.39 weak corr.     |
| Variance, %    | 65.3          | 23.0          | 7.1     | 3.7     | 0.9     | 0.4-0.69 moderate corr. |
| RI             | <b>0.4400</b> | -0.1428       | 0.6297  | -0.3678 | -0.5043 | 0.7-0.89 strong corr.   |
| Zs             | 0.4798        | 0.1221        | 0.3138  | -0.0452 | 0.8089  |                         |
| Germination, % | -0.4068       | 0.2572        | 0.6611  | 0.5752  | -0.0218 |                         |
| NG, %          | -0.4400       | -0.3757       | 0.1929  | -0.3565 | 0.2232  |                         |
| LG, %          | 0.0621        | <b>0.8379</b> | -0.0961 | -0.2256 | -0.1386 |                         |
| Y, %           | <b>0.4617</b> | -0.2350       | -0.1469 | 0.5950  | -0.1480 |                         |

n – number of tested plants; Phenotypes of morphoses: C – Co-untreated (control) plants, NG – normal green, LG – light green, Y – yellow Co-treated plants; <sup>a,b,c</sup>represent significant differences (<sup>a</sup>*P*<0.05; <sup>b</sup>*P*<0.01; <sup>c</sup>*P*<0.001) between the control and soil collected from different DF sites. Statistically significant (*P* < 0.05) correlation coefficients are presented in bold.

**Table S3.** The content of biochemical nonenzymatic stress markers (A), frequencies of SOD isozyme profiles (B) and concentrations of photosynthetic pigments (C) observed in Co-treated (NG, LG and Y) and untreated *Vicia faba* plants grown in control and polluted (DF mix) soils. (D) Pearson correlation matrix for all tested biochemical parameters and (E) eigenvalues, variance explained (%) and correlations between the principal components and the original biochemical variables obtained from Co-treated and untreated *V. faba* plants from soils of different pollution status.

(A)

| Soil-phenotype | Group I                                    |                           | Group II                   |                           |                           |                           |
|----------------|--------------------------------------------|---------------------------|----------------------------|---------------------------|---------------------------|---------------------------|
|                | H <sub>2</sub> O <sub>2</sub> ,<br>μM/g FW | MDA,<br>nmol/g FW         | Free proline,<br>μg/g FW   | Ascorbic acid,<br>mg/g FW | Polyphenols,<br>μg/g FW   | Flavonoids,<br>μg/g FW    |
| C-C            | 5.73 ± 0.63                                | 18.40 ± 3.56              | 44.40 ± 3.74               | 0.97 ± 0.11               | 63.9 ± 9.7                | 328.3 ± 14.3              |
| C-NG           | 9.80 ± 0.80                                | 13.41 ± 0.92 <sup>1</sup> | 58.40 ± 8.80               | 1.55 ± 0.14               | 182.6 ± 25.8 <sup>1</sup> | 489.5 ± 24.4 <sup>1</sup> |
| C-LG           | 6.50 ± 0.80                                | 14.41 ± 2.31              | 76.10 ± 9.00               | 1.60 ± 0.19               | 171.2 ± 23.8 <sup>1</sup> | 374.6 ± 26.9              |
| C-Y            | 8.10 ± 3.20                                | 14.87 ± 2.91              | 47.90 ± 2.80               | 1.34 ± 0.11               | 135.5 ± 9.8 <sup>1</sup>  | 242.6 ± 5.2 <sup>1</sup>  |
| DF-C           | 5.78 ± 0.81                                | 17.96 ± 3.88              | 26.85 ± 1.23 <sup>a</sup>  | 1.10 ± 0.13               | 68.5 ± 16.2               | 361.7 ± 3.9               |
| DF-NG          | 11.80 ± 1.20                               | 13.03 ± 1.03 <sup>2</sup> | 31.10 ± 4.50 <sup>a</sup>  | 1.35 ± 0.13               | 156.5 ± 42.7              | 375.4 ± 14.3 <sup>a</sup> |
| DF-LG          | 4.80 ± 2.00                                | 11.55 ± 1.92 <sup>1</sup> | 37.90 ± 3.10 <sup>1a</sup> | 0.98 ± 0.07 <sup>a</sup>  | 138.3 ± 50.5              | 352.5 ± 73.4              |
| DF-Y           | 2.30 ± 1.10                                | 10.66 ± 1.03 <sup>2</sup> | 42.10 ± 5.60 <sup>1</sup>  | 0.94 ± 0.05 <sup>b</sup>  | 111.5 ± 29.9              | 295.3 ± 2.4 <sup>1a</sup> |

(B)

| Soil-phenotype | Types of SOD isozyme profiles |                           |                          |             | Diversity of SOD profiles                                                            |    |     |
|----------------|-------------------------------|---------------------------|--------------------------|-------------|--------------------------------------------------------------------------------------|----|-----|
|                | I                             | II                        | III                      | Other       | I                                                                                    | II | III |
| C-C            | 0.33 ± 0.01                   | 0.19 ± 0.01               | 0.48 ± 0.02              | 0           | 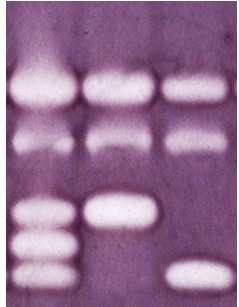 |    |     |
| C-NG           | 0.44 ± 0.02                   | 0.11 ± 0.01 <sup>1</sup>  | 0.33 ± 0.02 <sup>1</sup> | 0.12 ± 0.01 |                                                                                      |    |     |
| C-LG           | 0.58 ± 0.02 <sup>3</sup>      | 0.25 ± 0.02               | 0.17 ± 0.01 <sup>3</sup> | 0           |                                                                                      |    |     |
| C-Y            | 0.29 ± 0.01                   | 0.29 ± 0.02 <sup>1</sup>  | 0.42 ± 0.02              | 0           |                                                                                      |    |     |
| DF-C           | 0.47 ± 0.02 <sup>c</sup>      | 0.16 ± 0.01               | 0.37 ± 0.01 <sup>a</sup> | 0           |                                                                                      |    |     |
| DF-NG          | 0.38 ± 0.02                   | 0.24 ± 0.01 <sup>a</sup>  | 0.38 ± 0.02              | 0           |                                                                                      |    |     |
| DF-LG          | 0.25 ± 0.02 <sup>c</sup>      | 0.42 ± 0.02 <sup>3a</sup> | 0.33 ± 0.02 <sup>b</sup> | 0           |                                                                                      |    |     |
| DF-Y           | 0.39 ± 0.01 <sup>a</sup>      | 0.22 ± 0.01 <sup>1</sup>  | 0.39 ± 0.01              | 0           |                                                                                      |    |     |

(C)

| Soil-phenotype | Group III                        |                          |                          |                          |                          |                          |
|----------------|----------------------------------|--------------------------|--------------------------|--------------------------|--------------------------|--------------------------|
|                | Photosynthetic pigments, mg/g FW |                          |                          |                          | Pigment ratio            |                          |
|                | Chl a                            | Chl b                    | Chl(a+b)                 | Car                      | Chl a/b                  | Chl(a+b)/Car             |
| C-C            | 1.10 ± 0.05                      | 0.36 ± 0.01              | 1.46 ± 0.06              | 0.25 ± 0.01              | 3.27 ± 0.08              | 5.69 ± 0.07              |
| C-NG           | 1.08 ± 0.09                      | 0.38 ± 0.04              | 1.46 ± 0.13              | 0.27 ± 0.02              | 2.97 ± 0.16              | 5.39 ± 0.11              |
| C-LG           | 0.42 ± 0.05 <sup>1</sup>         | 0.09 ± 0.01 <sup>1</sup> | 0.51 ± 0.06 <sup>1</sup> | 0.13 ± 0.01 <sup>1</sup> | 4.98 ± 0.30 <sup>2</sup> | 3.71 ± 0.28 <sup>2</sup> |
| C-Y            | 0.06 ± 0.01 <sup>3</sup>         | 0.02 ± 0.01 <sup>3</sup> | 0.08 ± 0.01 <sup>3</sup> | 0.05 ± 0.01 <sup>2</sup> | 3.96 ± 0.66              | 1.65 ± 0.19 <sup>3</sup> |
| DF-C           | 1.12 ± 0.03                      | 0.33 ± 0.02              | 1.45 ± 0.06              | 0.26 ± 0.01              | 3.30 ± 0.15              | 5.53 ± 0.04              |
| DF-NG          | 1.13 ± 0.02                      | 0.36 ± 0.02              | 1.49 ± 0.04              | 0.28 ± 0.01              | 3.24 ± 0.14              | 5.37 ± 0.06              |
| DF-LG          | 0.54 ± 0.06 <sup>1</sup>         | 0.11 ± 0.01 <sup>2</sup> | 0.65 ± 0.05 <sup>1</sup> | 0.16 ± 0.01 <sup>1</sup> | 5.11 ± 0.29 <sup>2</sup> | 4.09 ± 0.26 <sup>2</sup> |
| DF-Y           | 0.11 ± 0.02 <sup>3</sup>         | 0.02 ± 0.01 <sup>3</sup> | 0.13 ± 0.02 <sup>3</sup> | 0.07 ± 0.01 <sup>3</sup> | 5.45 ± 0.67 <sup>2</sup> | 1.88 ± 0.16 <sup>3</sup> |

Phenotypes of morphoses: C – Co-untreated (control) plants, NG – normal green, LG – light green, Y – yellow Co-treated plants. Soil types: C – control soil, DF – drill factory soil mix. MDA – malondialdehyde, Chl – chlorophyll, Car – carotenoids, SOD – superoxide dismutase, FW – fresh weight. Significance level: <sup>a</sup>*P*<0.05, <sup>b</sup>*P*<0.01 compared with the respective phenotypic group from control (C) soil; <sup>1</sup>*P*<0.05, <sup>2</sup>*P*<0.01, <sup>3</sup>*P*<0.001 compared with Co-untreated plants, grown in the same soil variant.

(D)

|                               | Chl a          | Chl b          | Chl a+b        | Chl a/b        | Chl/Car        | Car            | Free Pro       | Ascorbic acid  | H <sub>2</sub> O <sub>2</sub> | SOD profile type I | SOD profile type II | SOD profile type III | SOD other types | Polyphenols    | Flavonoids     | MDA                       |
|-------------------------------|----------------|----------------|----------------|----------------|----------------|----------------|----------------|----------------|-------------------------------|--------------------|---------------------|----------------------|-----------------|----------------|----------------|---------------------------|
| Chl a                         | 1              |                |                |                |                |                |                |                |                               |                    |                     |                      |                 |                |                |                           |
| Chl b                         | <b>0.9851</b>  | 1              |                |                |                |                |                |                |                               |                    |                     |                      |                 |                |                | 0.2-0.39 weak corr.       |
| Chl a+b                       | <b>0.9991</b>  | <b>0.9914</b>  | 1              |                |                |                |                |                |                               |                    |                     |                      |                 |                |                | 0.4-0.69 moderate corr.   |
| Chl a/b                       | <b>-0.7938</b> | <b>-0.8643</b> | <b>-0.8141</b> | 1              |                |                |                |                |                               |                    |                     |                      |                 |                |                | 0.7-0.89 strong corr.     |
| Chl/Car                       | <b>0.9794</b>  | <b>0.9384</b>  | <b>0.9716</b>  | <b>-0.6984</b> | 1              |                |                |                |                               |                    |                     |                      |                 |                |                | 0.9-1.0 very strong corr. |
| Car                           | <b>0.9968</b>  | <b>0.9812</b>  | <b>0.9955</b>  | <b>-0.7728</b> | <b>0.9793</b>  | 1              |                |                |                               |                    |                     |                      |                 |                |                |                           |
| Free Pro                      | <b>-0.3223</b> | <b>-0.2957</b> | <b>-0.3197</b> | <b>0.2552</b>  | <b>-0.2228</b> | <b>-0.3027</b> | 1              |                |                               |                    |                     |                      |                 |                |                |                           |
| Ascorbic acid                 | <b>0.0531</b>  | <b>0.1197</b>  | <b>0.0682</b>  | <b>-0.2540</b> | <b>0.0607</b>  | <b>0.0912</b>  | <b>0.6704</b>  | 1              |                               |                    |                     |                      |                 |                |                |                           |
| H <sub>2</sub> O <sub>2</sub> | <b>0.4799</b>  | <b>0.5524</b>  | <b>0.4968</b>  | <b>-0.6991</b> | <b>0.4084</b>  | <b>0.5052</b>  | <b>0.0343</b>  | <b>0.6823</b>  | 1                             |                    |                     |                      |                 |                |                |                           |
| SOD profile type I            | <b>0.1633</b>  | <b>0.1598</b>  | <b>0.1651</b>  | <b>-0.0299</b> | <b>0.1993</b>  | <b>0.1796</b>  | <b>0.5149</b>  | <b>0.5785</b>  | <b>0.0794</b>                 | 1                  |                     |                      |                 |                |                |                           |
| SOD profile type II           | <b>-0.5215</b> | <b>-0.6162</b> | <b>-0.5487</b> | <b>0.6364</b>  | <b>-0.4244</b> | <b>-0.5030</b> | <b>-0.0831</b> | <b>-0.2807</b> | <b>-0.2622</b>                | <b>-0.5505</b>     | 1                   |                      |                 |                |                |                           |
| SOD profile type III          | <b>0.1518</b>  | <b>0.2083</b>  | <b>0.1665</b>  | <b>-0.4030</b> | <b>0.0273</b>  | <b>0.0977</b>  | <b>-0.6462</b> | <b>-0.6084</b> | <b>-0.0289</b>                | <b>-0.6939</b>     | <b>-0.1255</b>      | 1                    |                 |                |                |                           |
| SOD other types               | <b>0.3355</b>  | <b>0.4368</b>  | <b>0.3599</b>  | <b>-0.4321</b> | <b>0.3021</b>  | <b>0.3667</b>  | <b>0.3288</b>  | <b>0.4867</b>  | <b>0.3997</b>                 | <b>0.1863</b>      | <b>-0.5357</b>      | <b>-0.1325</b>       | 1               |                |                |                           |
| Polyphenols                   | <b>-0.1811</b> | <b>-0.1318</b> | <b>-0.1735</b> | <b>0.1286</b>  | <b>-0.1568</b> | <b>-0.1130</b> | <b>0.5722</b>  | <b>0.7797</b>  | <b>0.5249</b>                 | <b>0.2278</b>      | <b>0.1255</b>       | <b>-0.6272</b>       | <b>0.4928</b>   | 1              |                |                           |
| Flavonoids                    | <b>0.6601</b>  | <b>0.6715</b>  | <b>0.6632</b>  | <b>-0.4103</b> | <b>0.6907</b>  | <b>0.7055</b>  | <b>0.2408</b>  | <b>0.4803</b>  | <b>0.4355</b>                 | <b>0.4532</b>      | <b>-0.4643</b>      | <b>-0.4380</b>       | <b>0.7740</b>   | <b>0.4589</b>  | 1              |                           |
| MDA                           | <b>0.4900</b>  | <b>0.4757</b>  | <b>0.4910</b>  | <b>-0.6157</b> | <b>0.4919</b>  | <b>0.4294</b>  | <b>-0.0924</b> | <b>-0.0299</b> | <b>0.0949</b>                 | <b>0.1770</b>      | <b>-0.4214</b>      | <b>0.2951</b>        | <b>-0.1280</b>  | <b>-0.6115</b> | <b>-0.0501</b> | 1                         |

Statistically significant ( $P < 0.05$ ) correlation coefficients are presented in bold.

(E)

|                               | PC 1    | PC 2    | PC 3    | PC 4    | PC 5    | PC 6    | PC 7    |
|-------------------------------|---------|---------|---------|---------|---------|---------|---------|
| Eigenvalue                    | 7.4     | 4.2     | 1.6     | 1.2     | 0.9     | 0.5     | 0.1     |
| Variance, %                   | 46.4    | 26.1    | 10.0    | 7.7     | 5.9     | 3.0     | 0.9     |
| Chl a                         | 0.3523  | -0.0929 | 0.0072  | 0.1690  | 0.0783  | 0.0182  | 0.1171  |
| Chl b                         | 0.3612  | -0.0730 | 0.0439  | 0.0526  | -0.0105 | -0.0319 | 0.1374  |
| Chl a+b                       | 0.3555  | -0.0894 | 0.0132  | 0.1402  | 0.0562  | 0.0015  | 0.1061  |
| Chl a/b                       | -0.3215 | 0.0851  | -0.0923 | 0.3836  | -0.0376 | -0.0188 | 0.2143  |
| Chl/Car                       | 0.3379  | -0.0662 | -0.0411 | 0.2708  | 0.1430  | 0.2026  | 0.1268  |
| Car                           | 0.3524  | -0.0649 | 0.0367  | 0.2034  | 0.0818  | -0.0060 | 0.0973  |
| free Pro                      | -0.0566 | 0.3930  | -0.2464 | -0.1477 | -0.0378 | 0.5724  | 0.5925  |
| Ascorbic acid                 | 0.1018  | 0.4217  | 0.0052  | -0.3112 | 0.2445  | -0.0426 | -0.1578 |
| H <sub>2</sub> O <sub>2</sub> | 0.2230  | 0.1640  | 0.3656  | -0.3447 | 0.3794  | -0.2007 | 0.1135  |
| Polyphenols                   | -0.0098 | 0.4353  | 0.3509  | 0.0042  | 0.0902  | -0.0470 | 0.1154  |
| Flavonoids                    | 0.2707  | 0.2540  | 0.0675  | 0.3233  | -0.2113 | 0.1029  | -0.1513 |
| MDA                           | 0.1802  | -0.1974 | -0.4349 | -0.3323 | 0.2515  | 0.4086  | -0.3448 |
| SOD profile type I            | 0.1032  | 0.2904  | -0.5428 | 0.0647  | 0.0406  | -0.4315 | -0.0160 |
| SOD profile type II           | -0.2453 | -0.0505 | 0.3025  | 0.2982  | 0.4670  | 0.3876  | -0.2296 |
| SOD profile type III          | 0.0318  | -0.4008 | 0.2167  | -0.3647 | -0.2590 | 0.0173  | 0.3662  |
| SOD profile type Other        | 0.1904  | 0.2503  | 0.2049  | -0.0924 | -0.5951 | 0.2666  | -0.3920 |

**Table S4.** Full list of polymorphic transcript-derived fragments (TDFs) observed in Co-treated and untreated *V. faba* plants after one month of growth in control soil and polluted soil mix from the territory of the former drill factory (DF).

| TDF number | TDF length, nt | Intensity of polymorphic TDF bands |     |    |    |                         |    |    |    | Homologs in plants                                                                                         | Sequen-ce homology, % | E value                | Accession number |
|------------|----------------|------------------------------------|-----|----|----|-------------------------|----|----|----|------------------------------------------------------------------------------------------------------------|-----------------------|------------------------|------------------|
|            |                | Control (C) soil                   |     |    |    | Drill factory (DF) soil |    |    |    |                                                                                                            |                       |                        |                  |
|            |                | C                                  | NG  | LG | Y  | C                       | NG | LG | Y  |                                                                                                            |                       |                        |                  |
| N1         | 380            | 1                                  | 1   | 1  | 1  | 0                       | 1  | 0  | 0  | <i>Pisum sativum</i> gene for plastocyanin                                                                 | 98                    | 8 × 10 <sup>-123</sup> | X16082.1         |
|            |                |                                    |     |    |    |                         |    |    |    | PREDICTED: <i>Medicago truncatula</i> plastocyanin (LOC11426844)                                           | 89                    | 4 × 10 <sup>-88</sup>  | XM_003603795.3   |
|            |                |                                    |     |    |    |                         |    |    |    | <i>Glycine max</i> plastocyanin (LOC100306554)                                                             | 74.3                  | 3 × 10 <sup>-34</sup>  | M_001249724.3    |
| N2         | 540            | 1                                  | 1   | 0  | 1  | 1                       | 1  | 0  | 0  | PREDICTED: <i>Medicago truncatula</i> eukaryotic aspartyl protease family protein, mRNA                    | 87.15                 | 8 × 10 <sup>-118</sup> | XM_003612194.3   |
|            |                |                                    |     |    |    |                         |    |    |    | PREDICTED: <i>Cicer arietinum</i> aspartyl protease family protein 1-like (LOC101514975)                   | 80.73                 | 2 × 10 <sup>-92</sup>  | XM_004512119.2   |
|            |                |                                    |     |    |    |                         |    |    |    | PREDICTED: <i>Glycine soja</i> aspartyl protease family protein 1-like (LOC114419518)                      | 79.17                 | 1 × 10 <sup>-76</sup>  | XM_028385203.1   |
| N4         | 350            | 1                                  | 1↓  | 1  | 1↓ | 0                       | 0  | 0  | 0  | <i>Medicago truncatula</i> carboxy-terminal region remorin mRNA                                            | 96                    | 2 × 10 <sup>-09</sup>  | XM_013589416.1   |
|            |                |                                    |     |    |    |                         |    |    |    | PREDICTED: <i>Cicer arietinum</i> remorin-like (LOC101514413), mRNA                                        | 64                    | 1 × 10 <sup>-05</sup>  | XM_004510749.2   |
| N5         | 300            | 0                                  | 0   | 1  | 0  | 0                       | 0  | 0  | 1↓ | <i>Lupinus luteus</i> ABA-activated 1 protein                                                              | 81.48                 | 6 × 10 <sup>-09</sup>  | KM281724.1       |
| N10        | 360            | 1                                  | 0   | 1↓ | 1  | 0                       | 0  | 1↓ | 1  | <i>Lupinus angustifolius</i> cultivar Tanjil chromosome LG-12                                              | 86.67                 | 2 × 10 <sup>-04</sup>  | CP023124.1       |
| N13        | 300            | 1                                  | 1↓↓ | 1  | 1↓ | 1                       | 0  | 0  | 0  | PREDICTED: <i>Medicago truncatula</i> cell division control protein 2 homolog 2 (LOC25493338)              | 87.15                 | 2 × 10 <sup>-52</sup>  | XM_013601820.2   |
|            |                |                                    |     |    |    |                         |    |    |    | PREDICTED: <i>Cicer arietinum</i> cell division control protein 2 homolog 2 (LOC101505571), mRNA           | 77.24                 | 4 × 10 <sup>-16</sup>  | XM_004504677.3   |
|            |                |                                    |     |    |    |                         |    |    |    | PREDICTED: <i>Arachis hypogaea</i> cell division control protein 2 homolog (LOC112792320)                  | 77.24                 | 4 × 10 <sup>-16</sup>  | XM_020378939.1   |
| N15        | 270            | 1                                  | 1   | 1↓ | 1  | 1↓                      | 0  | 0  | 1↓ | <i>Medicago sativa</i> CDC2 kinase                                                                         | 90                    | 2 × 10 <sup>-58</sup>  | X70707.1         |
|            |                |                                    |     |    |    |                         |    |    |    | <i>Medicago truncatula</i> cyclin-dependent kinase mRNA                                                    | 89.39                 | 8 × 10 <sup>-57</sup>  | XM_013601820.2   |
|            |                |                                    |     |    |    |                         |    |    |    | PREDICTED: <i>Arachis hypogaea</i> cell division control protein 2 homolog (LOC112792320)                  | 74.46                 | 7 × 10 <sup>-20</sup>  | XM_025835510.2   |
| N16        | 380            | 1                                  | 1   | 0  | 1↓ | 1                       | 1  | 0  | 0  | <i>Vicia faba</i> plastid, complete genome                                                                 | 100                   | 8 × 10 <sup>-148</sup> | KF042344.1       |
|            |                |                                    |     |    |    |                         |    |    |    | <i>Vicia villosa</i> chloroplast NADH dehydrogenase subunit 4-like                                         | 98.98                 | 2 × 10 <sup>-143</sup> | KT457043.1       |
|            |                |                                    |     |    |    |                         |    |    |    | <i>Medicago sativa</i> chloroplast NADH dehydrogenase subunit 4-like                                       | 97.28                 | 6 × 10 <sup>-137</sup> | KT457032.1       |
| N17        | 370            | 0                                  | 0   | 0  | 0  | 1                       | 1  | 1↓ | 1↓ | <i>Vicia faba</i> plastid, complete genome                                                                 | 97.95                 | 2 × 10 <sup>-137</sup> | KF042344.1       |
|            |                |                                    |     |    |    |                         |    |    |    | <i>Vicia villosa</i> chloroplast NADH dehydrogenase subunit 4-like                                         | 96.92                 | 4 × 10 <sup>-133</sup> | KT457043.1       |
|            |                |                                    |     |    |    |                         |    |    |    | <i>Medicago sativa</i> chloroplast NADH dehydrogenase subunit 4-like                                       | 95.55                 | 1 × 10 <sup>-127</sup> | KJ850238.1       |
| N18        | 200            | 1                                  | 1   | 1  | 1  | 0                       | 0  | 0  | 0  | <i>Lupinus angustifolius</i> cultivar Tanjil chromosome LG-04                                              | 77.59                 | 0.44                   | CP023116.1       |
|            |                |                                    |     |    |    |                         |    |    |    | <i>Gossypium raimondii</i> isolate D5-4 chromosome D5_05                                                   | 82.86                 | 0.44                   | CP032557.1       |
| N20        | 400            | 1                                  | 1↓↓ | 1↓ | 1↓ | 1                       | 1  | 1↓ | 1↓ | <i>Medicago truncatula</i> 40S ribosomal protein S20-2                                                     | 81.32                 | 2 × 10 <sup>-36</sup>  | XM_003625168.3   |
|            |                |                                    |     |    |    |                         |    |    |    | PREDICTED: <i>Cicer arietinum</i> 40S ribosomal protein S20-2-like (LOC101509579)                          | 76.85                 | 7 × 10 <sup>-29</sup>  | XM_004493111.2   |
|            |                |                                    |     |    |    |                         |    |    |    | PREDICTED: <i>Medicago truncatula</i> 40S ribosomal protein S20-2 (LOC25484890)                            | 81.25                 | 4 × 10 <sup>-26</sup>  | XM_013613903.2   |
| N21        | 380            | 1↓                                 | 0   | 1  | 0  | 0                       | 0  | 0  | 0  | <i>Medicago truncatula</i> zinc finger protein, GH1 protein, hydroxyproline-rich glycoprotein, and bHLH TF | 83.05                 | 2 × 10 <sup>-05</sup>  | EU306659.1       |
| N22        | 400            | 1↓                                 | 1↓  | 1  | 0  | 1↓                      | 0  | 0  | 0  | PREDICTED: <i>Medicago truncatula</i> DNA-directed RNA polymerase V subunit 5A (LOC11419143)               | 72.37                 | 7 × 10 <sup>-35</sup>  | XM_003624985.3   |
|            |                |                                    |     |    |    |                         |    |    |    | PREDICTED: <i>Cicer arietinum</i> DNA-directed RNA polymerase V subunit 5A-like (LOC101509909)             | 68.16                 | 3 × 10 <sup>-20</sup>  | XM_004493361.3   |
|            |                |                                    |     |    |    |                         |    |    |    | PREDICTED: <i>Cajanus cajan</i> DNA-directed RNA polymerase V subunit 5A (LOC109815637)                    | 92.5                  | 1 × 10 <sup>-05</sup>  | XM_020380398.1   |

|     |     |    |    |    |    |    |    |    |    |                                                                                                                          |       |                      |                |
|-----|-----|----|----|----|----|----|----|----|----|--------------------------------------------------------------------------------------------------------------------------|-------|----------------------|----------------|
| N26 | 450 | 1↓ | 0  | 1  | 0  | 1↓ | 0  | 1↓ | 0  | PREDICTED: <i>Cicer arietinum</i> photosystem I chlorophyll a/b-binding protein 6, chloroplastic (LOC101494214)          | 82.9  | $1 \times 10^{-89}$  | XM_004488043.3 |
|     |     |    |    |    |    |    |    |    |    | PREDICTED: <i>Medicago truncatula</i> photosystem I chlorophyll a/b-binding protein 6, chloroplastic (LOC11440680)       | 82.33 | $5 \times 10^{-75}$  | XM_003595293.3 |
|     |     |    |    |    |    |    |    |    |    | PREDICTED: <i>Glycine soja</i> photosystem I chlorophyll a/b-binding protein 6, chloroplastic-like (LOC114425589)        | 82.31 | $4 \times 10^{-26}$  | XM_028392529.1 |
| N29 | 220 | 1↓ | 1↓ | 1↓ | 1  | 0  | 0  | 0  | 0  | <i>Pisum sativum</i> ultraviolet-B-repressible protein                                                                   | 81.03 | $2 \times 10^{-19}$  | AY065654.1     |
|     |     |    |    |    |    |    |    |    |    | <i>Chionochloa rigida</i> subsp. <i>amara</i> <i>psbM</i> ( <i>psbM</i> ) gene                                           | 90.91 | 0.053                | GQ305171.1     |
| N32 | 250 | 1  | 0  | 0  | 0  | 1↓ | 0  | 0  | 0  | PREDICTED: <i>Medicago truncatula</i> elongation factor Tu, chloroplastic (LOC11412641), mRNA                            | 77.91 | 0.001                | XM_003601112.3 |
|     |     |    |    |    |    |    |    |    |    | PREDICTED: <i>Cicer arietinum</i> elongation factor Tu, chloroplastic (LOC101508466)                                     | 77.91 | 0.001                | XM_004501812.3 |
| N33 | 240 | 1  | 1  | 0  | 0  | 0  | 0  | 0  | 0  | <i>Pisum sativum</i> DEAD box RNA helicase                                                                               | 90.34 | $1 \times 10^{-55}$  | AY167671.1     |
|     |     |    |    |    |    |    |    |    |    | PREDICTED: <i>Medicago truncatula</i> eukaryotic initiation factor 4A-15 (LOC25494213)                                   | 70.13 | $3 \times 10^{-12}$  | XM_013603006.2 |
|     |     |    |    |    |    |    |    |    |    | PREDICTED: <i>Papaver somniferum</i> kelch repeat-containing protein At3g27220-like (LOC113302770)                       | 100   | 2.0                  | XM_026551713.1 |
| N35 | 440 | 1  | 1  | 1  | 1  | 1↓ | 1↓ | 1↓ | 1↓ | PREDICTED: <i>Medicago truncatula</i> kunitz trypsin inhibitor 2 (LOC11420195)                                           | 84.09 | $1 \times 10^{-83}$  | XM_003620121.3 |
|     |     |    |    |    |    |    |    |    |    | PREDICTED: <i>Cicer arietinum</i> kunitz trypsin inhibitor 2-like (LOC101489822), mRNA                                   | 90.42 | $8 \times 10^{-55}$  | XM_004515002.3 |
| N36 | 400 | 1↓ | 1↓ | 1↓ | 1↓ | 1  | 1  | 1  | 1  | PREDICTED: <i>Medicago truncatula</i> pentatricopeptide repeat-containing protein At1g71460, chloroplastic (LOC11420489) | 82.20 | $4 \times 10^{-78}$  | XM_003604187.3 |
|     |     |    |    |    |    |    |    |    |    | PREDICTED: <i>Cicer arietinum</i> pentatricopeptide repeat-containing protein At1g71460, chloroplastic (LOC101513833)    | 84.05 | $3 \times 10^{-85}$  | XM_027335473.1 |
|     |     |    |    |    |    |    |    |    |    | PREDICTED: <i>Vigna angularis</i> pentatricopeptide repeat-containing protein At1g71460, chloroplastic (LOC108328265)    | 79.43 | $5 \times 10^{-57}$  | XM_017562099.1 |
| N37 | 500 | 1  | 1  | 1  | 1  | 0  | 0  | 1↓ | 0  | <i>Pisum sativum</i> PSI light-harvesting antenna chlorophyll a/b-binding protein (lhca-P4) mRNA, complete cds           | 93.16 | $2 \times 10^{-139}$ | AF002248.3     |
|     |     |    |    |    |    |    |    |    |    | PREDICTED: <i>Medicago truncatula</i> chlorophyll a-b binding protein P4, chloroplastic (LOC25490405)                    | 86.23 | $2 \times 10^{-101}$ | XM_013603828.2 |
|     |     |    |    |    |    |    |    |    |    | PREDICTED: <i>Cicer arietinum</i> chlorophyll a-b binding protein P4, chloroplastic (LOC101505314)                       | 82.17 | $1 \times 10^{-84}$  | XM_004513844.3 |
| N39 | 350 | 1  | 1  | 1  | 1  | 1↓ | 1↓ | 1↓ | 1↓ | <i>Pisum sativum</i> photosystem I chlorophyll a/b binding protein                                                       | 91.44 | $1 \times 10^{-94}$  | EF208907.1     |
|     |     |    |    |    |    |    |    |    |    | PREDICTED: <i>Medicago truncatula</i> chlorophyll a-b binding protein P4, chloroplastic (LOC25490405)                    | 85.38 | $3 \times 10^{-72}$  | XM_013603828.2 |
|     |     |    |    |    |    |    |    |    |    | PREDICTED: <i>Cicer arietinum</i> chlorophyll a-b binding protein P4, chloroplastic (LOC101505314), mRNA                 | 79.15 | $2 \times 10^{-55}$  | XM_004513844.3 |
| N40 | 350 | 0  | 0  | 0  | 1  | 0  | 0  | 0  | 1  | PREDICTED: <i>Medicago truncatula</i> IQ domain-containing protein IQM1 (LOC25494220)                                    | 84.62 | $7 \times 10^{-08}$  | XM_013603017.2 |
|     |     |    |    |    |    |    |    |    |    | PREDICTED: <i>Lupinus angustifolius</i> IQ domain-containing protein IQM1-like (LOC109356113)                            | 83.33 | 0.019                | XM_019599453.1 |
| N41 | 300 | 1  | 1↓ | 1↓ | 1  | 0  | 0  | 0  | 0  | <i>Pisum sativum</i> PSI light-harvesting antenna chlorophyll a/b-binding protein (lhca-P4)                              | 91.44 | $6 \times 10^{-65}$  | AF002248.3     |
|     |     |    |    |    |    |    |    |    |    | PREDICTED: <i>Medicago truncatula</i> chlorophyll a-b binding protein P4, chloroplastic (LOC25490405)                    | 86.26 | $3 \times 10^{-49}$  | XM_013603828.2 |
|     |     |    |    |    |    |    |    |    |    | PREDICTED: <i>Cicer arietinum</i> chlorophyll a-b binding protein P4, chloroplastic (LOC101505314)                       | 87.5  | $8 \times 10^{-51}$  | XM_004513844.3 |
| N42 | 500 | 1  | 1  | 1  | 1  | 1↓ | 1↓ | 1↓ | 1↓ | <i>Vicia faba</i> plastid, complete genome                                                                               | 97.14 | 0                    | KF042344.1     |
|     |     |    |    |    |    |    |    |    |    | <i>Lathyrus clymenum</i> chloroplast, complete genome                                                                    | 95.71 | 0                    | KJ850235.1     |
|     |     |    |    |    |    |    |    |    |    | <i>Pisum sativum</i> subsp. <i>sativum</i> isolate WL1072 chloroplast, partial genome                                    | 95.09 | 0                    | MG917089.1     |

|     |     |    |   |   |    |    |    |    |    |                                                                                                                  |       |                      |                |
|-----|-----|----|---|---|----|----|----|----|----|------------------------------------------------------------------------------------------------------------------|-------|----------------------|----------------|
| N43 | 450 | 1  | 1 | 0 | 0  | 1  | 1  | 1  | 0  | <i>Medicago truncatula</i> Ser/Thr phosphatase family, 2C domain protein mRNA                                    | 90.93 | $1 \times 10^{-129}$ | XM_003629194.3 |
|     |     |    |   |   |    |    |    |    |    | PREDICTED: <i>Cicer arietinum</i> probable protein phosphatase 2C 46 (LOC101506357), mRNA                        | 88.19 | $1 \times 10^{-114}$ | XM_004509347.3 |
| N47 | 320 | 1↓ | 0 | 0 | 0  | 1  | 1  | 1  | 1↓ | PREDICTED: <i>Cicer arietinum</i> alpha, alpha-trehalose-phosphate synthase [UDP-forming] 6 (LOC101489971), mRNA | 87.58 | $7 \times 10^{-40}$  | XM_004503283.3 |
|     |     |    |   |   |    |    |    |    |    | <i>Medicago truncatula</i> trehalose-6-phosphate synthase domain protein mRNA                                    | 84.42 | $4 \times 10^{-32}$  | XM_003630929.3 |
| N49 | 150 | 1  | 1 | 1 | 1  | 0  | 0  | 0  | 0  | PREDICTED: <i>Cicer arietinum</i> cyclic dof factor 2-like (LOC101490004), mRNA                                  | 79.52 | $2 \times 10^{-10}$  | XM_004489342.2 |
|     |     |    |   |   |    |    |    |    |    | PREDICTED: <i>Medicago truncatula</i> cyclic dof factor 2 (LOC11414470), mRNA                                    | 91.67 | $2 \times 10^{-09}$  | XM_003618459.3 |
| N50 | 230 | 1↓ | 1 | 0 | 1↓ | 1  | 0  | 0  | 0  | <i>Pisum sativum</i> subsp. <i>elatius</i> His5 gene for Histone H1 subtype 5, strain JI1091                     | 87.50 | 0.004                | FR848866.1     |
| N51 | 480 | 0  | 0 | 1 | 1  | 1↓ | 1↓ | 1↓ | 1  | PREDICTED: <i>Cajanus cajan</i> putative glutamine amidotransferase GAT1_2.1 (LOC109801873), mRNA                | 74.26 | $1 \times 10^{-22}$  | XM_020363023.2 |
|     |     |    |   |   |    |    |    |    |    | PREDICTED: <i>Glycine soja</i> putative glutamine amidotransferase GAT1_2.1 (LOC114384863), mRNA                 | 76.14 | $4 \times 10^{-22}$  | XM_028344684.1 |
| N54 | 180 | 0  | 0 | 0 | 0  | 1  | 1  | 1  | 1  | PREDICTED: <i>Cicer arietinum</i> uncharacterized LOC101492001 (LOC101492001)                                    | 86.96 | $3 \times 10^{-21}$  | XM_004504383.3 |
| N56 | 390 | 0  | 1 | 0 | 0  | 1↓ | 0  | 1  | 0  | PREDICTED: <i>Cicer arietinum</i> protein GPR107-like (LOC101492747), mRNA                                       | 74.42 | $1 \times 10^{-52}$  | XM_004494925.3 |
|     |     |    |   |   |    |    |    |    |    | PREDICTED: <i>Vigna angularis</i> protein GPR107-like (LOC108327775), mRNA                                       | 88.33 | $9 \times 10^{-10}$  | XM_017561474.1 |

Phenotypes of morphoses: C – Co-untreated (control) plants; NG – normal green, LG – light green, Y – yellow phenotypes of Co-treated plants. 0, 1 ↓ ↓, 1 ↓ and 1 represents the intensity of and individual TDF band in ascending order.

**Table S5.** The size and number of loci obtained with functional CDDP primers used in the evaluation of Co- and soil-induced changes in the DNA sequence of *Vicia faba* plants after 1 month of exposure to the tested soils.

| Primer  | Number of analysed loci | Size range, bp | Polymorphic loci |      |
|---------|-------------------------|----------------|------------------|------|
|         |                         |                | number           | %    |
| WRKY-R1 | 14                      | 500-220        | 6                | 42.9 |
| Myb2    | 12                      | 250-1500       | 3                | 25.0 |
| ERF1    | 19                      | 120-2300       | 9                | 47.4 |
| KNOX3   | 15                      | 210-2000       | 8                | 53.3 |
| ABP1-1  | 18                      | 180-1950       | 10               | 55.6 |
| Total   | 78                      | 120-2300       | 36               | 46.2 |
| Average | 15.6                    |                | 7.2              | 44.8 |
